# Supplementary material
Source: publisher figshare collection journal article supplement (https://frontiersin.figshare.com/ndownloader/files/23553017)
Supplement: Supplementary file [file 23553017]

## Supplementary information

### Distribution of molecules related to neurotransmission in the nervous system of the mussel *Crenomytilus grayanus*

Elena Kotsyuba<sup>1</sup>, Alexander Kalachev<sup>1</sup>, Polina Kameneva<sup>1</sup> & Vyacheslav Dyachuk<sup>1,2\*</sup>

<sup>1</sup> A.V. Zhirmunsky National Scientific Center of Marine Biology, Far Eastern Branch, Russian Academy of Sciences, Vladivostok 690041, Russia

<sup>2</sup>Department of Nanophotonics and Metamaterials, IFMO University, St. Petersburg, Russia

**\*Corresponding author:** [slavad83@gmail.com](mailto:slavad83@gmail.com)

**Supplementary Figure 1.** Whole structure of the main ganglia of the mussel *Crenomytilus grayanus*. **(a)** cerebropleural ganglion; **(b)** pedal ganglion; **(c)** visceral ganglion stained for 5-HT with DAPI. CPG, cerebropleural ganglion; PG, pedal ganglion; VG, visceral ganglion; CPPC, cerebral-pleural-pedal connectives; CPVC, cerebral-pleural-visceral connectives. Bar, 1mm.

**Other Supplementary Information for this manuscript includes the following:**

#### Supplementary Movie 1

Whole-mount immunostaining of the cerebropleural ganglion with antibody against 5-HT.

#### Supplementary Movie 2

Whole-mount immunostaining of the cerebropleural ganglion with antibody against FMRFamide.

#### Supplementary Movie 3

Whole-mount immunostaining of the pedal ganglion with antibody against 5-HT.

#### Supplementary Movie 4

Whole-mount immunostaining of the pedal ganglion with antibody against FMRFamide.

### **Supplementary Movie 5**

Whole-mount immunostaining of the visceral ganglion with antibody against FMRFamide.
